# Supplementary material
Source: PubMed Central journal article supplement (PMC3438675)
Supplement: NIHMS349323-supplement-01.pdf [file NIHMS349323-supplement-01.pdf]

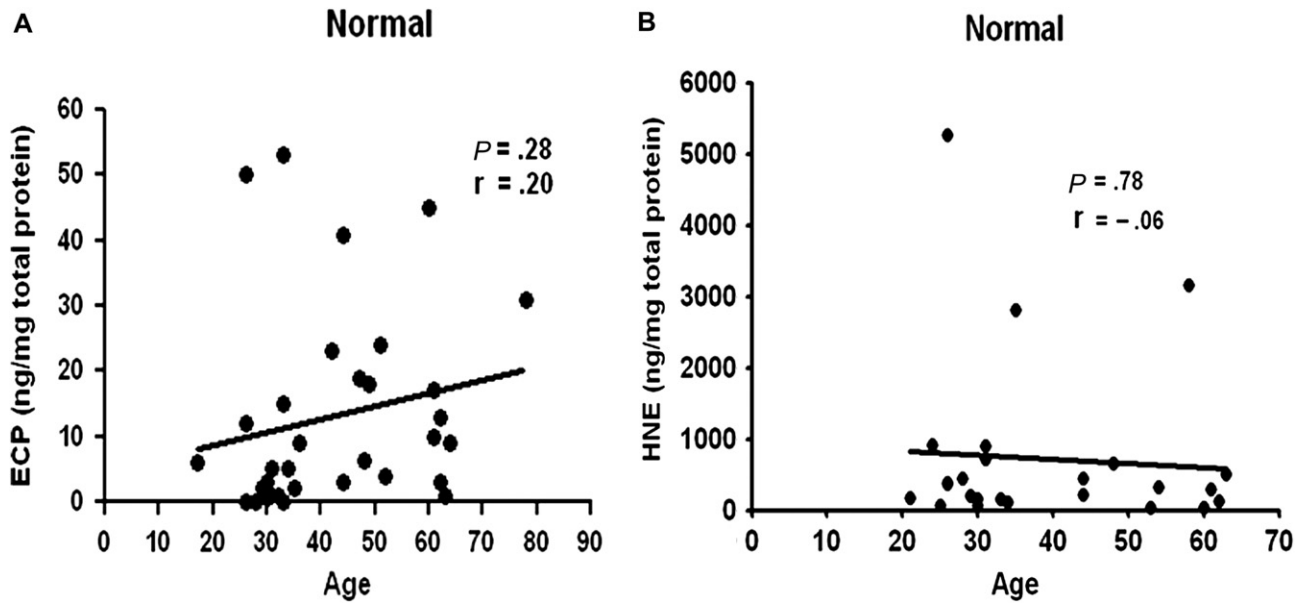

**FIG E1.** Age-related distribution of the ECP and HNE protein levels in nasal lavage fluids from normal subjects as determined by ELISA. There was no significant correlation between age and levels of ECP (A) or HNE (B).

**TABLE E1.** Subjects' characteristics in immunologic marker measurement

|                       | Control subjects |              | Patients with CRSsNP |              | Patients with CRSwNP |              |
|-----------------------|------------------|--------------|----------------------|--------------|----------------------|--------------|
|                       | Nonelderly       | Elderly      | Nonelderly           | Elderly      | Nonelderly           | Elderly      |
| Immunologic markers   |                  |              |                      |              |                      |              |
| ECP, n                | 25               | 8            | 28                   | 4            | 22                   | 9            |
| Age (y), mean (range) | 36.5 (17-52)     | 64.7 (60-78) | 36 (24-57)           | 62.8 (60-67) | 42.5 (30-57)         | 68.7 (61-73) |
| Sex (M/F)             | 12/13            | 4/4          | 11/17                | 1/3          | 16/6                 | 8/1          |
| Asthma                | –                | –            | 6                    | 1            | 9                    | 6            |
| Inhaled steroids      | –                | –            | 4                    | 0            | 6                    | 5            |
| HNE, n                | 22               | 4            | 33                   | 3            | 24                   | 7            |
| Age (y), mean (range) | 34.5 (21-58)     | 61.5 (60-63) | 37.1 (21-57)         | 61.3 (60-64) | 43.7 (32-57)         | 66.9 (60-73) |
| Sex (M/F)             | 9/13             | 2/2          | 15/18                | 0/3          | 17/7                 | 4/3          |
| Asthma                | –                | –            | 5                    | 1            | 8                    | 2            |
| Inhaled steroids      | –                | –            | 0                    | 0            | 3                    | 1            |
| S100A8/9, n           | 13               | 5            | 9                    | 4            | 9                    | 4            |
| Age (y), mean (range) | 33.9 (24-52)     | 62.0 (61-64) | 44.2 (34-57)         | 63.0 (60-68) | 40.6 (24-53)         | 61.7 (61-64) |
| Sex (M/F)             | 6/7              | 3/2          | 4/5                  | 1/3          | 6/3                  | 4/0          |
| Asthma                | –                | –            | 1                    | 1            | 4                    | 1            |
| Inhaled steroids      | –                | –            | 0                    | 0            | 4                    | 1            |

M, Male; F, female.
